# Supplementary material
Source: Springer Nature journal article supplement (https://www.springermedizin.de/resource/supplementary/12950_2009_120_MOESM6_ESM.pdf/9558020)

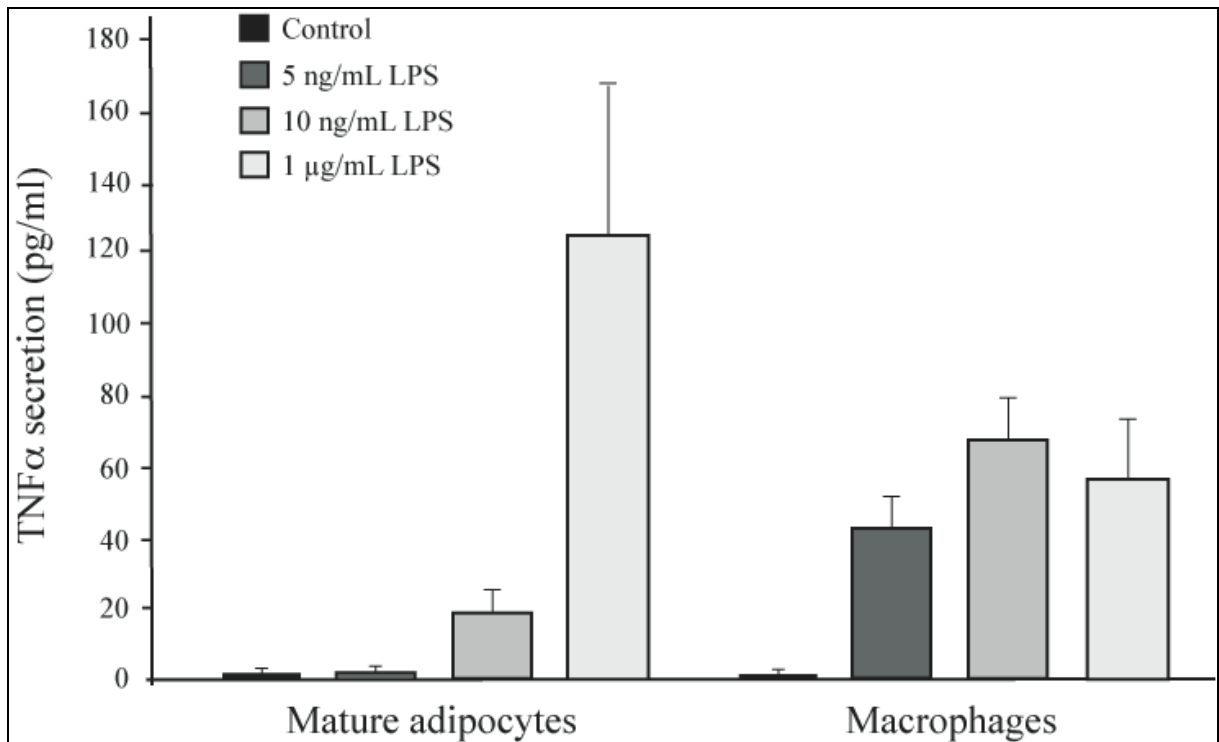

Supplement: MOESM6 [file 9558020]
